# Supplementary material for: A layered double hydroxide-derived exchange spring magnet array grown on graphene and its application as an ultrathin electromagnetic wave absorbing material
Source: Royal Society of Chemistry journal article supplement (doi:10.1039/c9tc03254a), 2019-01-01
Supplement: c9tc03254a1.pdf [file c9tc03254a1.pdf]

## Supplementary Information

### Layered Double Hydroxide-derived Exchange Spring Magnet Array

#### Grown on Graphene and its Application as an Ultrathin

#### Electromagnetic Wave Absorbing Material †

Xiaonan Zhao<sup>a</sup>, Xiaoyu Nie<sup>a</sup>, Ya Li<sup>a</sup>, Yanhui Pu,<sup>a</sup> Xin Sun<sup>a,b</sup>, Ronghai Yu<sup>a</sup>, Xiaofang Liu<sup>\*a</sup> and Jianglan Shui<sup>a</sup>

<sup>a</sup>*School of Materials Science and Engineering, Beihang University, Beijing 100083, P. R. China*

<sup>b</sup>*Science and Technology on Electromagnetic Scattering Laboratory, Beijing, 100854, China.*

\*Corresponding author: Xiaofang Liu; E-mail address: liuxf05@buaa.edu.cn.

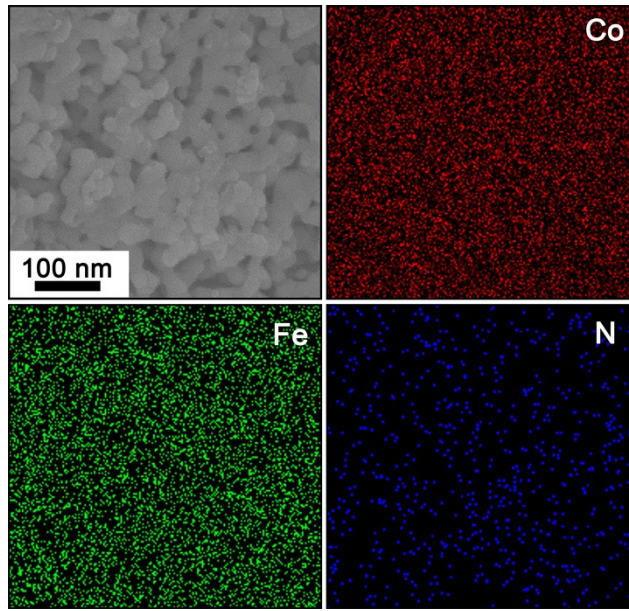

**Figure S1.** EDS elemental mappings of S-N450.

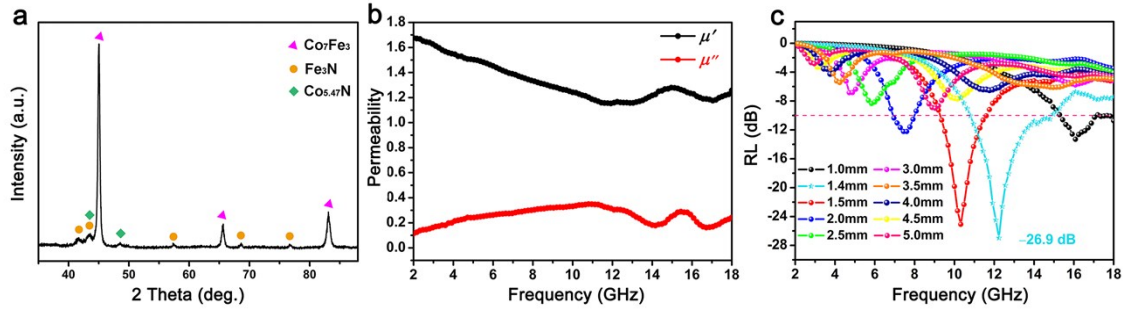

**Figure S2.** (a) XRD pattern, (b) complex permeability and (c) RL curves of  $\text{Fe}_3\text{N}/\text{Co}_{5.47}\text{N}/\text{Co}_7\text{Fe}_3$  composite.

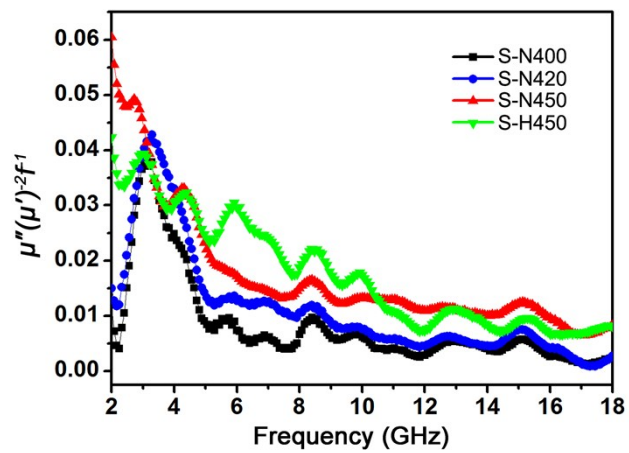

**Figure S3.** Frequency dependence of  $\mu''(\mu')^{-2}f^{-1}$  values for S-N400, S-N420, S-N450 and S-H450.

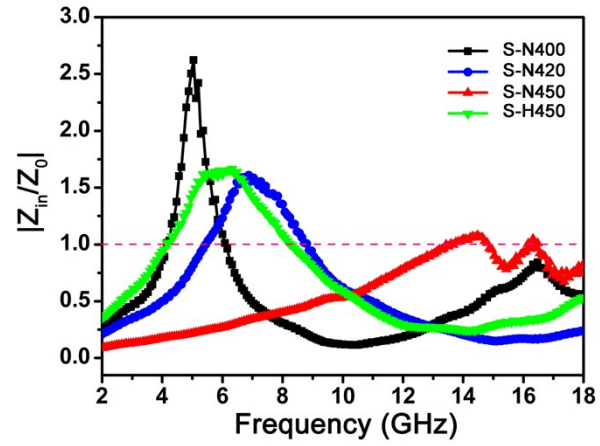

**Figure S4.** Frequency dependence of relative input impedance ( $|Z_{in}/Z_0|$ ) of S-N400, S-N420, S-N450 and S-H450.

**Table S1.** Comparison of EMW absorbing properties of rGO-based magnetic/dielectric hybrid absorbers.

| Samples                                                                       | Matching thickness (mm) | Matching frequency (GHz) | Effective bandwidth | Min. RL (dB) | Min. RL/ Matching thickness (dB/mm) | Ref.      |
|-------------------------------------------------------------------------------|-------------------------|--------------------------|---------------------|--------------|-------------------------------------|-----------|
| Fe/rGO                                                                        | 3.0                     | 5.6                      | 1.4                 | -36.5        | -12.2                               | 1         |
| Co <sub>3</sub> O <sub>4</sub> /Co/rGO                                        | 2.0                     | 13.1                     | /                   | -52.8        | -26.4                               | 2         |
| Fe <sub>3</sub> O <sub>4</sub> /rGO                                           | 2.5                     | 6.7                      | 4.2                 | -41.9        | -16.8                               | 3         |
| MnFe <sub>2</sub> O <sub>4</sub> /rGO                                         | 1.7                     | 15.4                     | 5.2                 | -47.5        | -27.9                               | 4         |
| CoNi/rGO                                                                      | 6.0                     | 17.5                     | > 2.1               | -23.3        | -3.9                                | 5         |
| BiFeO <sub>3</sub> /rGO                                                       | 1.6                     | 10.7                     | 2.1                 | -28.7        | -17.9                               | 6         |
| CoS/rGO                                                                       | 4.0                     | 6.8                      | 2.0                 | -54.2        | -13.6                               | 7         |
| ZnO-Ni-C/rGO                                                                  | 2.1                     | 15.2                     | 5.6                 | -59.3        | -28.2                               | 8         |
| MoS <sub>2</sub> /rGO                                                         | 2.3                     | 11.7                     | 4.2                 | -50.9        | -22.1                               | 9         |
| ZnFe <sub>2</sub> O <sub>4</sub> /rGO                                         | 2.5                     | 9.4                      | 3.2                 | -41.1        | -16.4                               | 10        |
| ZnFe <sub>2</sub> O <sub>4</sub> /rGO/CuS                                     | 2.2                     | 14.6                     | 7.5                 | -55.4        | -25.2                               | 11        |
| CoFe <sub>2</sub> O <sub>4</sub> /rGO                                         | 2.0                     | 12.4                     | 5.0                 | -47.9        | -23.9                               | 12        |
| FeNi/rGO                                                                      | 4.6                     | 4.8                      | 1.9                 | -26.7        | -5.9                                | 13        |
| BaFe <sub>12</sub> O <sub>19</sub> /Fe <sub>3</sub> O <sub>4</sub> /rGO       | 1.8                     | 10.0                     | 5.7                 | -46.0        | -25.7                               | 14        |
| Ni <sub>0.33</sub> Co <sub>0.67</sub> Fe <sub>2</sub> O <sub>4</sub> /rGO     | 3.0                     | 9.1                      | 3.2                 | -47.5        | -15.8                               | 15        |
| Fe <sub>3</sub> O <sub>4</sub> /Fe/rGO                                        | 4.0                     | 9.2                      | 3.9                 | -23.1        | -5.8                                | 16        |
| NiFe <sub>2</sub> O <sub>4</sub> /rGO                                         | 2.7                     | 11.5                     | 4.1                 | -58.0        | -21.5                               | 17        |
| CeO <sub>2</sub> /rGO                                                         | 3.5                     | 6.4                      | 2.3                 | -53.7        | -15.3                               | 18        |
| Fe <sub>3</sub> N/Co <sub>5.47</sub> N/Co <sub>7</sub> Fe <sub>3</sub> /N-rGO | 1.4                     | 16.4                     | > 4                 | -59.1        | -41.7                               | This work |
| “/”:                                                                          |                         | not                      |                     |              | mentioned                           |           |

## References

- 1 Y. Li, M. Yu, P. Yang and J. Fu, *Ind. Eng. Chem. Res.*, 2017, **56**, 8872-8879.
- 2 J. Yuan, Q. Liu, S. Li, Y. Lu, S. Jin, K. Li, H. Chen and H. Zhang, *Synthetic Met.*, 2017, **228**, 32-40.
- 3 G. Cui, Y. Lu, W. Zhou, X. Lv, J. Hu, G. Zhang and G. Gu, *Nanomaterials*, 2019, **9**.
- 4 G. Zhang, R. Shu, Y. Xie, H. Xia, Y. Gan, J. Shi and J. He, *Mater. Lett.*, 2018, **231**, 209-212.
- 5 X. Guo, Z. Bai, B. Zhao, R. Zhang and J. Chen, *J. Mater. Sci.-Mater. El.*, 2016, **27**, 8408-8415.
- 6 D. Moitra, S. Dhole, B. K. Ghosh, M. Chandel, R. K. Jani, M. K. Patra, S. R. Vadera and N. N. Ghosh, *J. Phys. Chem. C*, 2017, **121**, 21290-21304.
- 7 T. Huang, M. He, Y. Zhou, S. Li, B. Ding, W. Pan, S. Huang and Y. Tong, *Synthetic Met.*, 2017, **224**, 46-55.
- 8 X. Liu, L.-S. Wang, Y. Ma, Y. Qiu, Q. Xie, Y. Chen and D.-L. Peng, *Chem. Eng. J.*, 2018, **333**, 92-100.
- 9 Y. Wang, D. Chen, X. Yin, P. Xu, F. Wu and M. He, *ACS Appl. Mater. Interfaces*, 2015, **7**, 26226-26234.
- 10 R. Shu, G. Zhang, J. Zhang, X. Wang, M. Wang, Y. Gan, J. Shi and J. He, *Mater. Lett.*, 2018, **215**, 229-232.
- 11 Y. Wang, X. Gao, X. Wu, W. Zhang, Q. Wang and C. Luo, *Ceram. Int.*, 2018, **44**, 9816-9822.
- 12 M. Zong, Y. Huang, H. Wu, Y. Zhao, Q. Wang and X. Sun, *Mater. Lett.*, 2014, **114**, 52-55.
- 13 Z. Su, L. Tan, J. Tao, C. Zhang, R. Yang and F. Wen, *Phys. Status Solidi B*, 2018, **255**, 1700553.
- 14 S. Jiao, M. Wu, X. Yu, H. Hu, Z. Bai, P. Dai, T. Jiang, H. Bi and G. Li, *Mater. Res. Bull.*, 2018, **108**, 89-95.
- 15 M. Gao, Y. Zhao, S. Wang, Y. Xu, C. Feng, D. Shi and Q. Jiao, *Ceram. Int.*, 2019, **45**, 7188-7195.
- 16 Y. Ding, L. Zhang, Q. Liao, G. Zhang, S. Liu and Y. Zhang, *Nano Res.*, 2016, **9**, 2018-2025.
- 17 Y. Zhang, X. Wang and M. Cao, *Nano Res*, 2018, **11**, 1426-1436.
- 18 Z. Shen, H. Xing, H. Wang, H. Jia, Y. Liu, A. Chen and P. Yang, *J. Alloy. Compd.*, 2018, **753**, 28-34.
